# Supplementary material
Source: PubMed Central journal article supplement (PMC10866327)

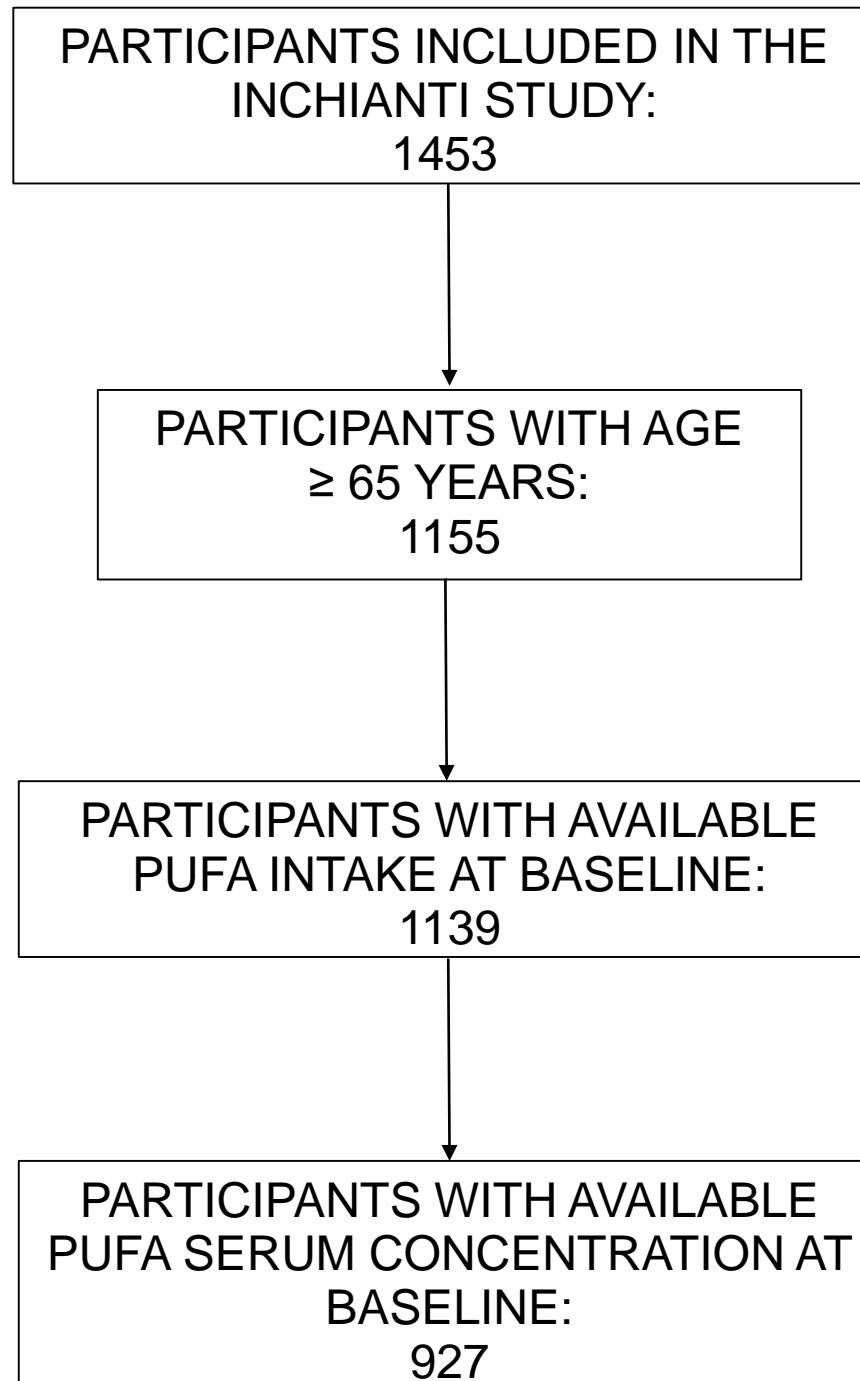

Supplement: NIHMS1923958-supplement-Supplementary_Figure_1.pdf [file NIHMS1923958-supplement-Supplementary_Figure_1.pdf]
